# Supplementary material for: Biophysical evaluation to categorize pathogenicity of cancer-predisposing mutations identified in the BARD1 BRCT domain
Source: Royal Society of Chemistry journal article supplement (doi:10.1039/c8ra06524a), 2018-01-01

**Legends to Supplementary figures: -**

1. **(Figure 1 supplementary):** -(A) Structure of BARD1BRCT (PDB ID: 2NTE) showing cancer - predisposing mutation sites. All the mutant sites are demarcated in red. (B) Expression and purification profile of BARD1BRCT *wild-type* and mutants. (C) Comparative overlay of elution profile of BARD1BRCT *wild-type* and mutant proteins in superdex-75 column (GE Healthcare).
2. **(Figure 2 supplementary): - Comparative chemical crosslinking analysis of BARD1BRCT *wild-type* and mutant proteins.** (A) Chemical crosslinking of BARD1BRCT *wild-type*, (B) Cys 645 Arg, (C) Ser 761 Asn and (D) Val 695 Leu. Control (C) shows untreated sample with glutaraldehyde.
3. **(Figure 3 Supplementary): - Comparative overlay of fluorescence emission spectra of BARD1BRCT *wild-type* and mutants to ascertain intermediate formation.** (A) Thermal denaturation of BARD1BRCT *wild-type*(B) Val 695 Leu, (C) Ser 761 Asn and (D) Cys 645 Arg.
4. **(Figure 4 supplementary): - Comparative representation of *Wild-type* and mutant proteins showing average number of intra-molecular hydrogen bond formed during the MD simulation.** The average number of intra-molecular hydrogen bond is represented for every 10ns of MDS. *Wild-type* (Black), Cys 645 Arg (Green), Val 695 Leu (Blue) and Ser 761Asn (Red).
5. **(Figure 5 supplementary): - Comparative overlay of Eigenvalue on Eigenvector index for *wild-type* and mutant proteins.** Comparative profile of Eigenvalue attained for their respective Eigenvector for *wild-type* (black), Cys 645 Arg (green), Val 695 Leu (blue) and Ser 761 Asn (red) mutant proteins.
6. **(Figure 6 supplementary): - Representation of projections of first two Eigenvectors on Residues for *wild-type* and mutant proteins:** - (A) and (B) Projection of Eigenvector 1 and 2 on residue for *Wild-type*. (C) and (D) Projection of Eigenvector 1 and 2 on residue for Cys 645 Arg. (E) and (F) Projection of Eigenvector 1 and 2 on residue for Val 695 Leu. (G) and (H) Projection of Eigenvector 1 and 2 on residue for Ser 761 Asn.
7. **(Figure 7 supplementary): - Representative RMSF structures of *wild-type* and mutant proteins.** The most flexible region is represented in red and rigid regions during the MDS are in blue. (A) *Wild-type*, (B) Cys 645 Arg, (C) Val 695 Leu and (D) Ser 761 Asn.
8. **(Figure 8 supplementary): - Comparative secondary structure representation of *Wild-type* and mutant proteins showing different components of secondary structure.** 4 (A) Secondary structure of *wild-type* protein, (B) Cys 645 Arg,(C) Val 695 Leu and (D) Ser 761 Asn.
9. **(Figure 9 Supplementary): - Comparative analysis of Intra-molecular interaction of *wild-type* and mutant protein:** - (A) BARD1BRCT *Wild-type* and (B) Cys 645 Arg, (C) BARD1BRCT *wild-type* and (D) Val 695 Leu, (E) BARD1BRCT *wild-type* and (F) Ser 761 Asn

Supplementary Figure-1

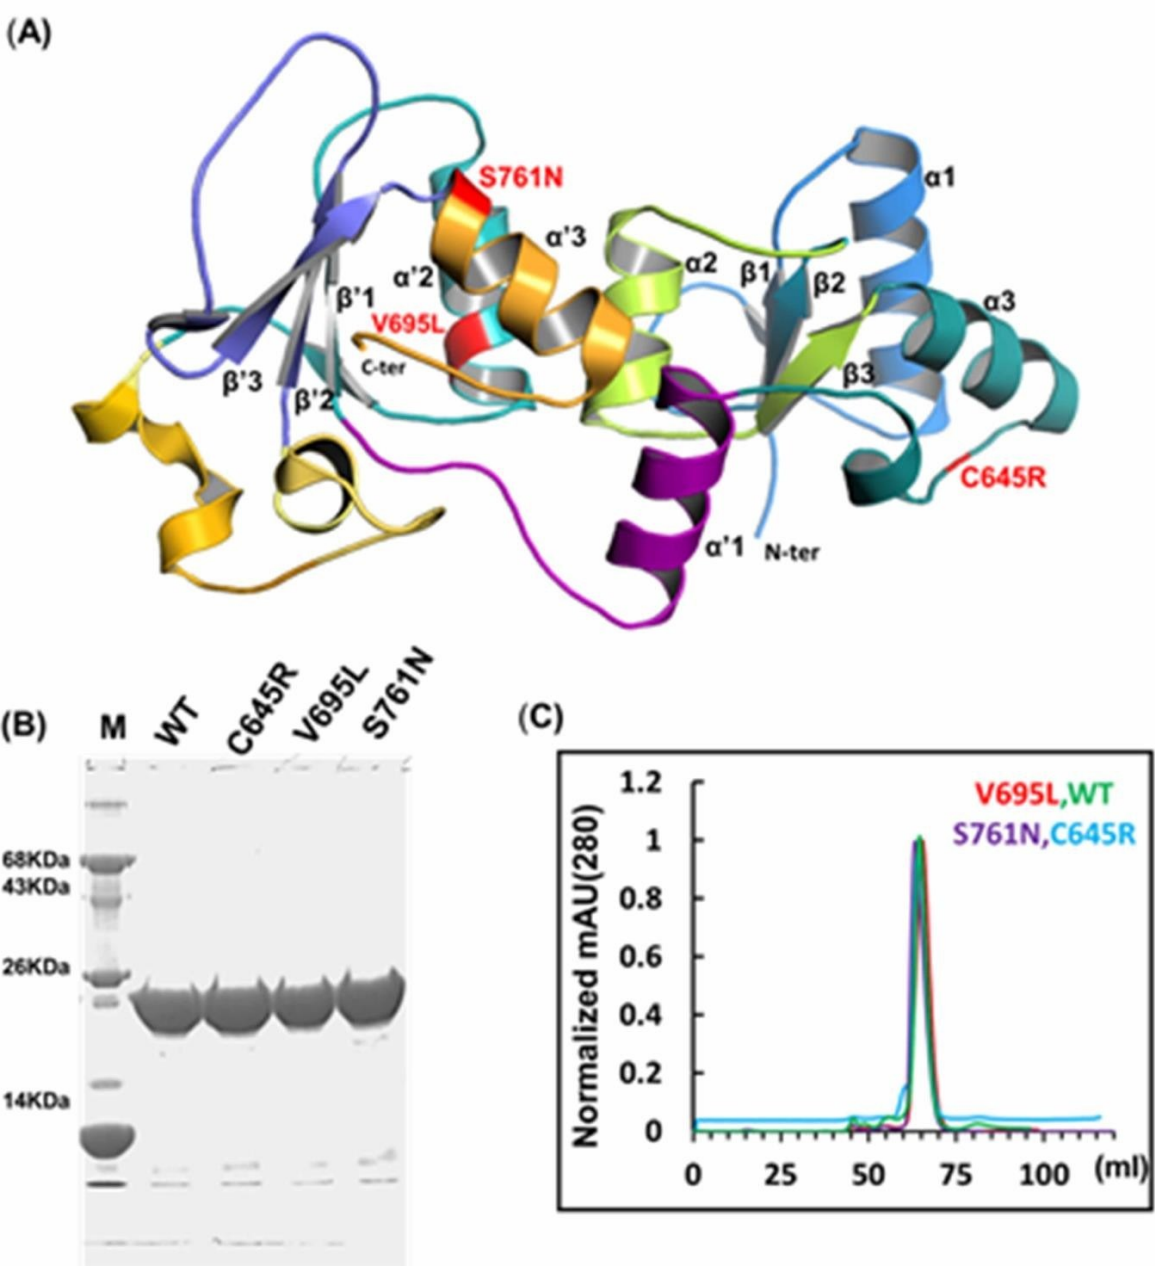

Supplementary Figure-2

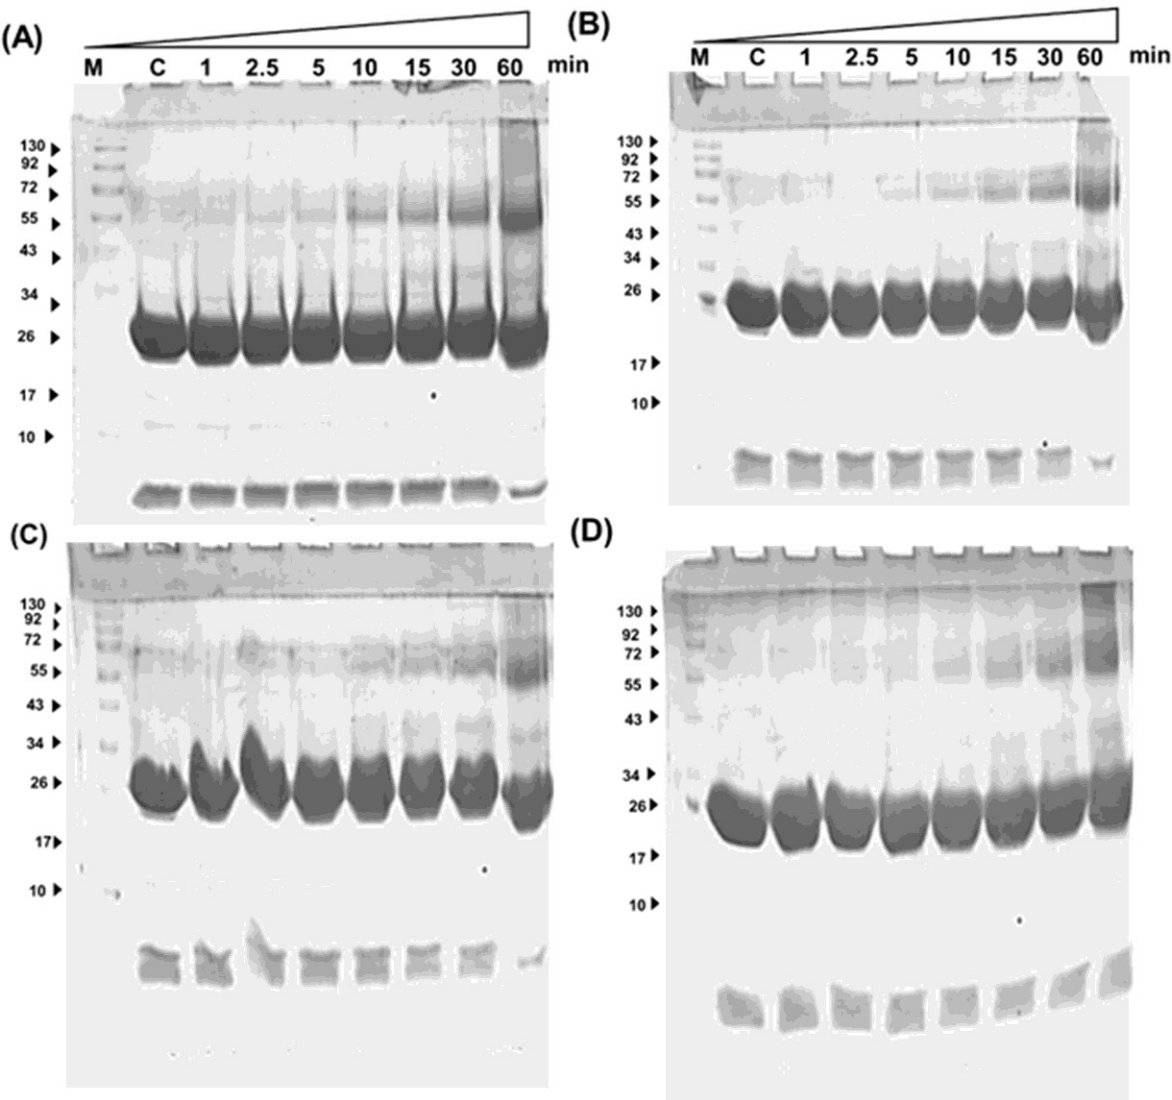

Supplementary Figure-3

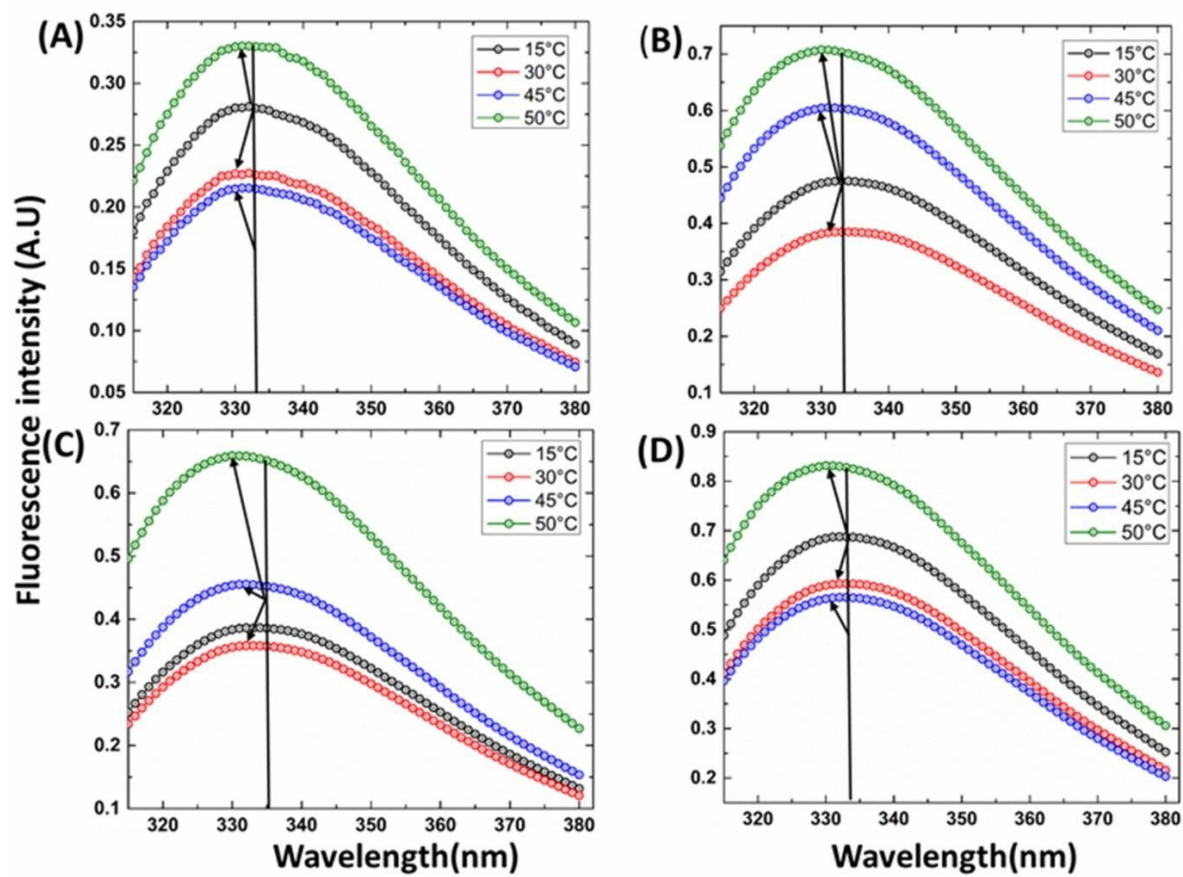

Supplementary Figure -4

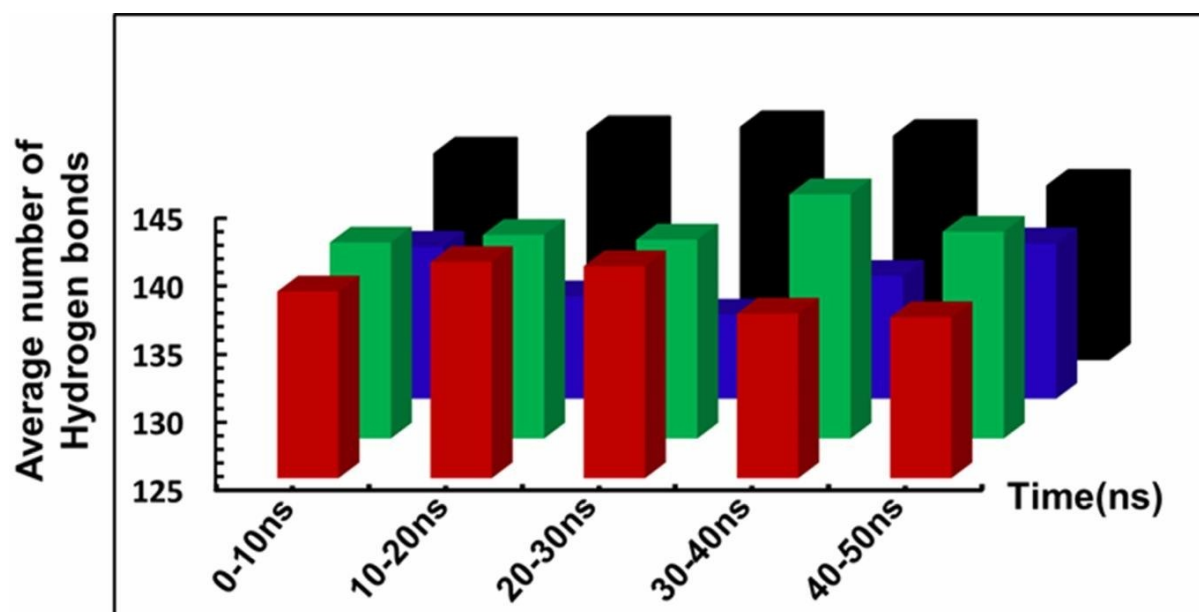

Supplementary Figure -5

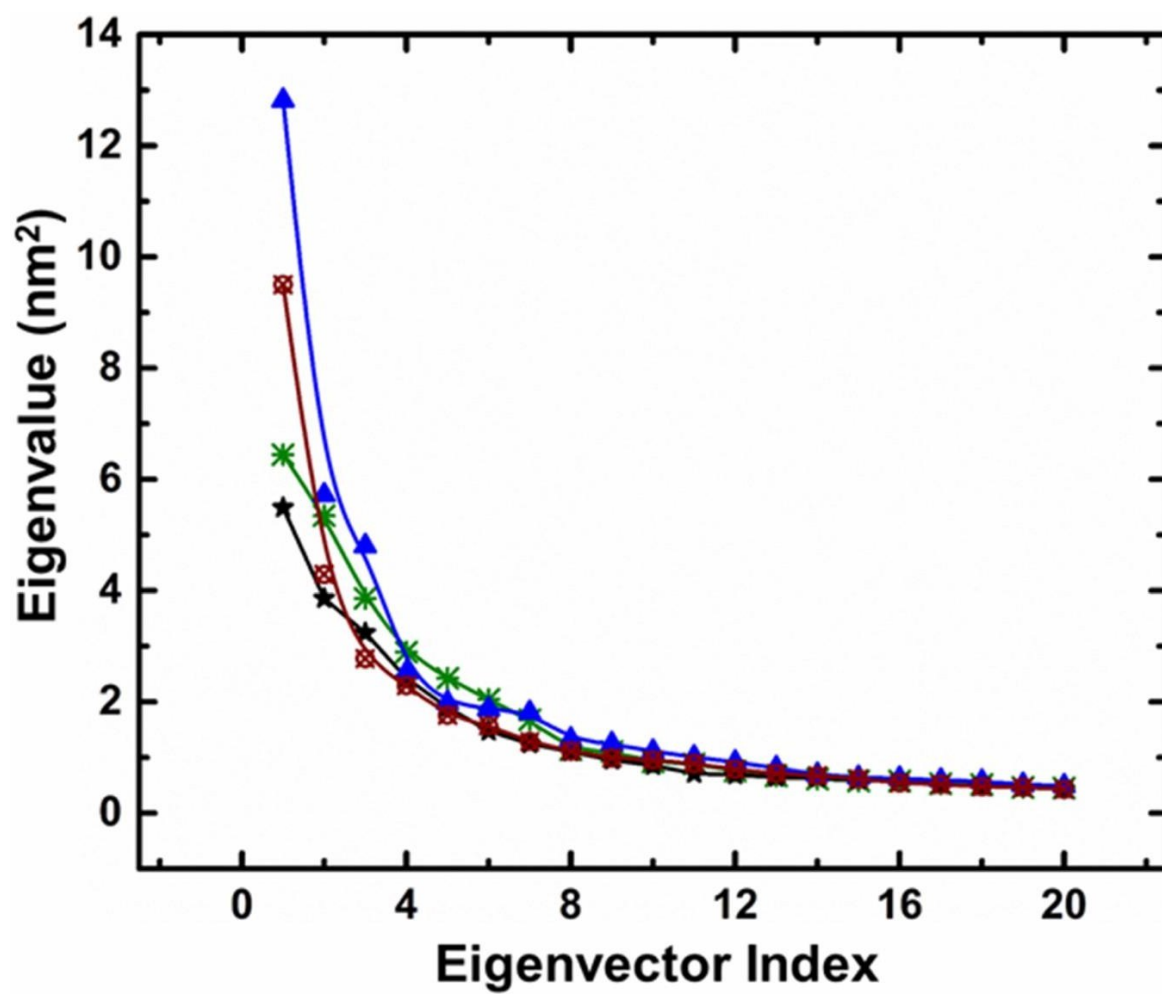

Supplementary Figure-6

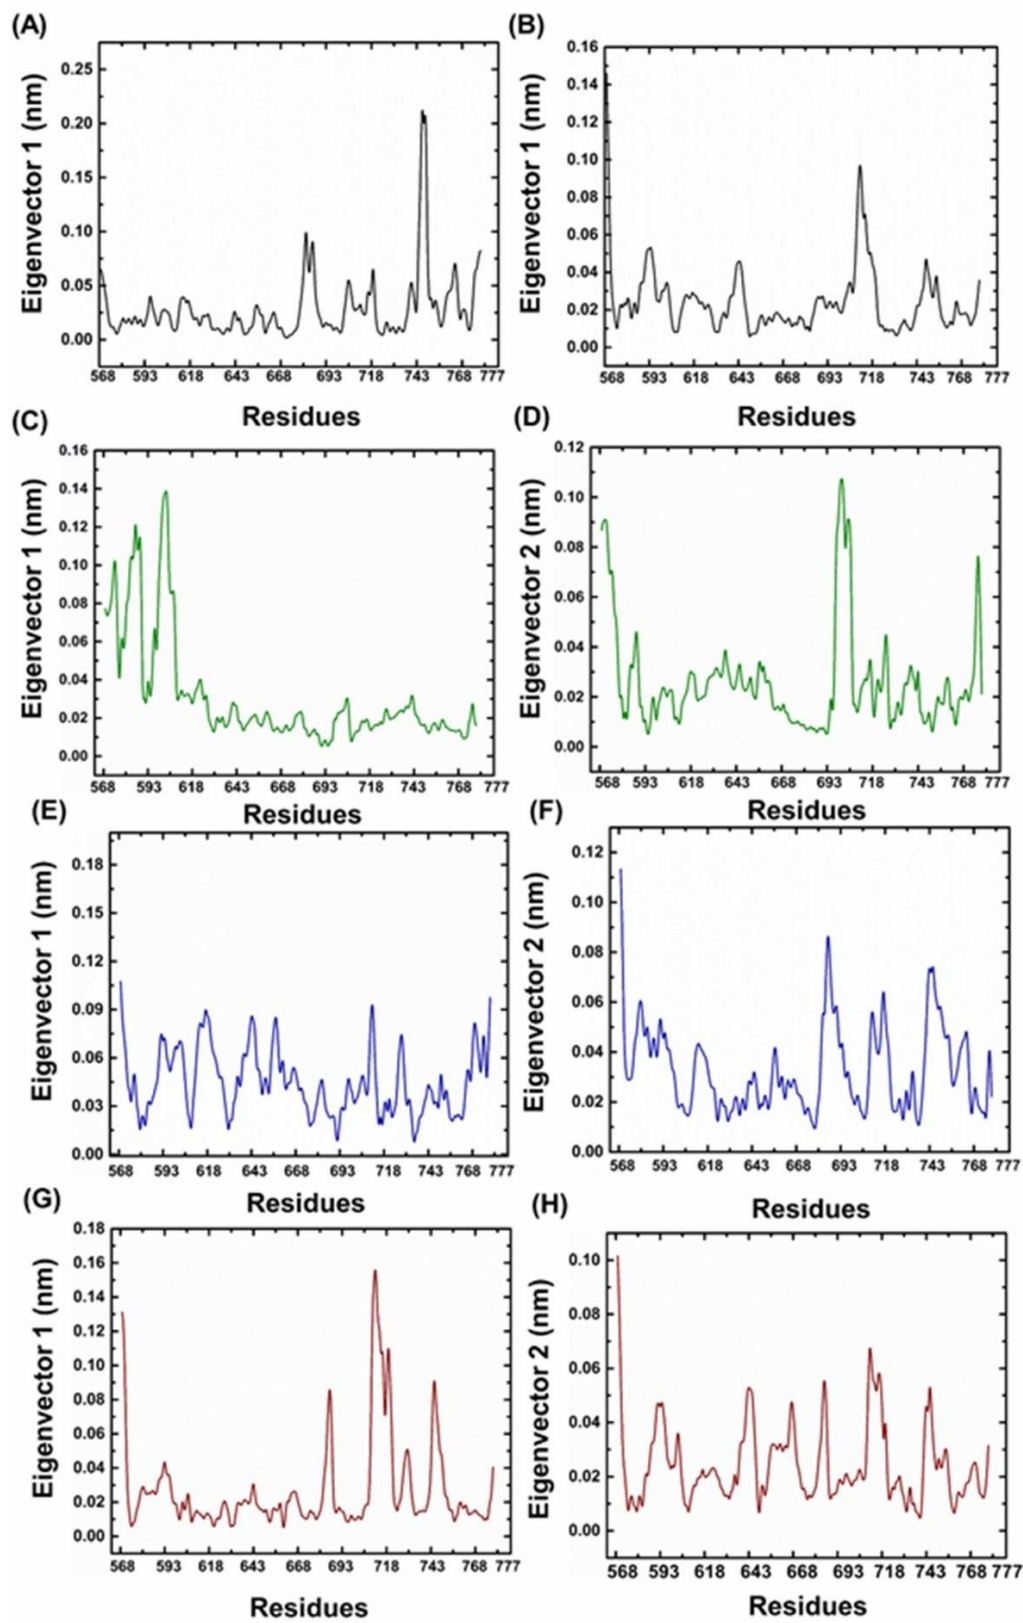



Supplementary Figure-7

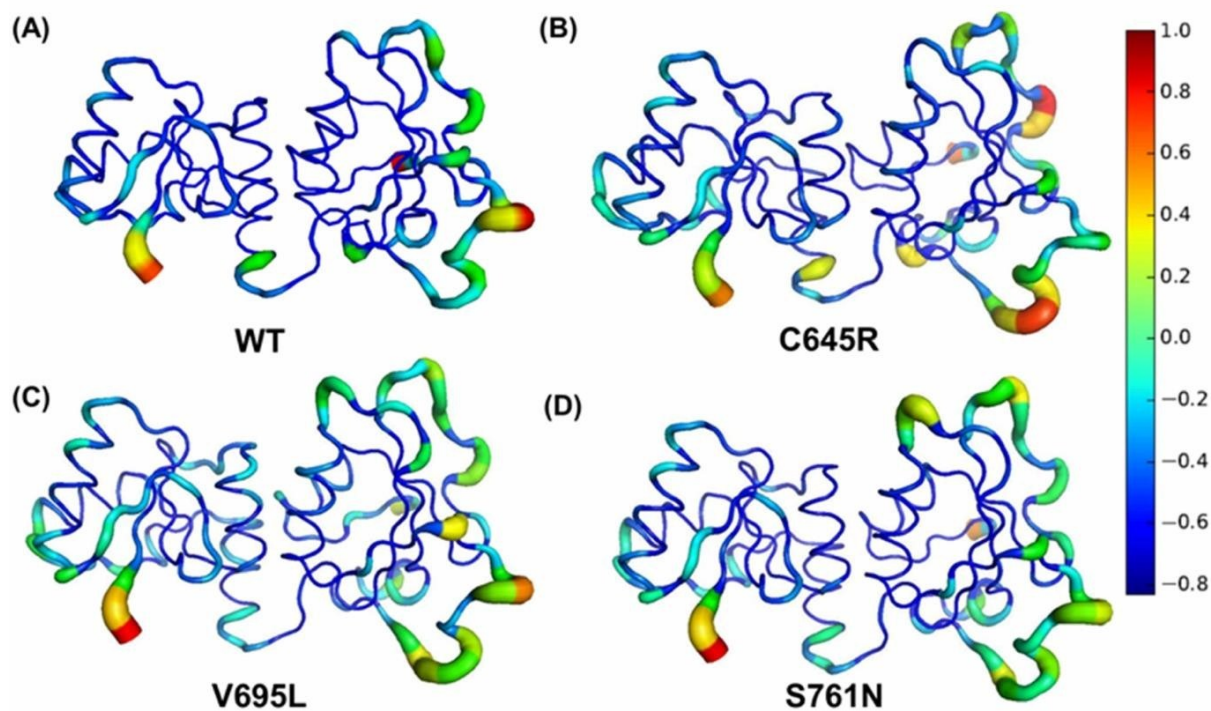

Supplementary Figure -8

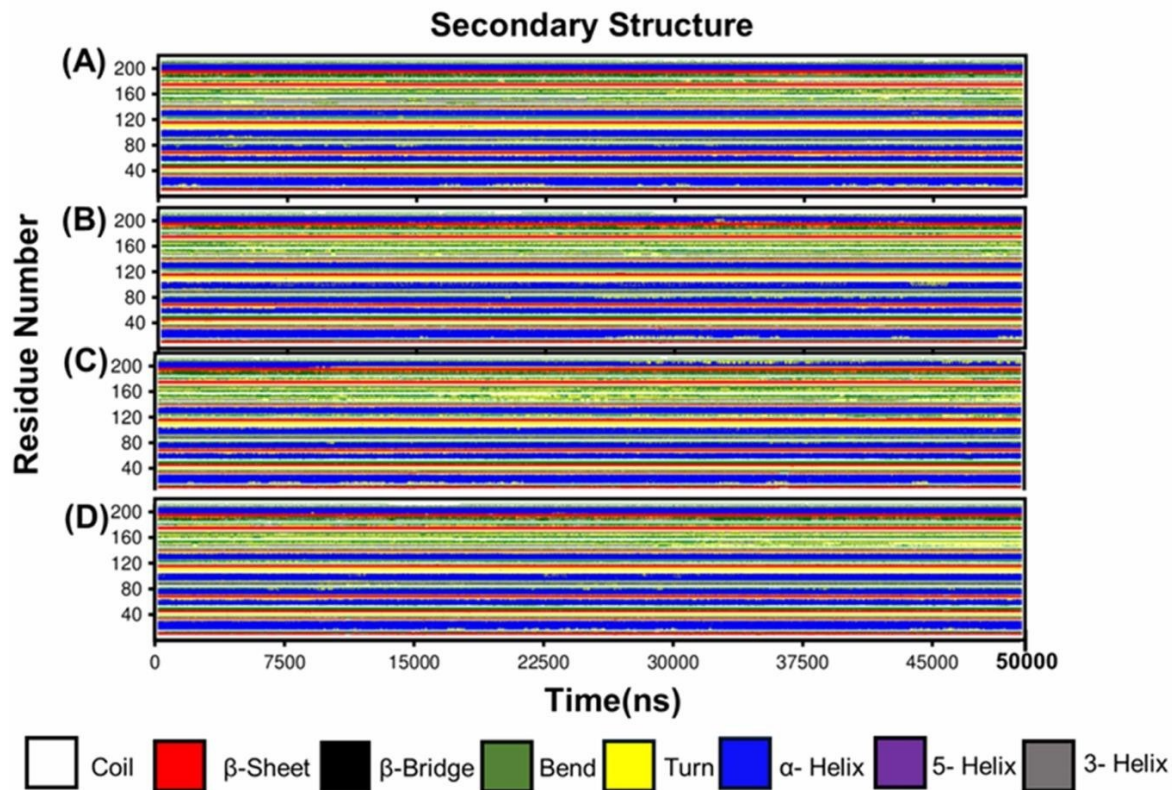

Supplementary Figure-9

(A)

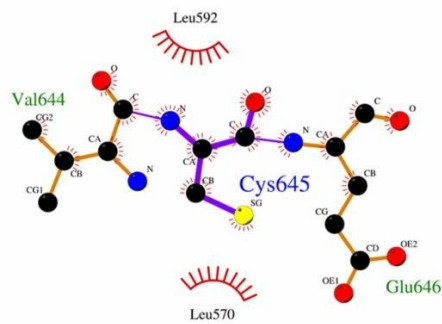

(B)

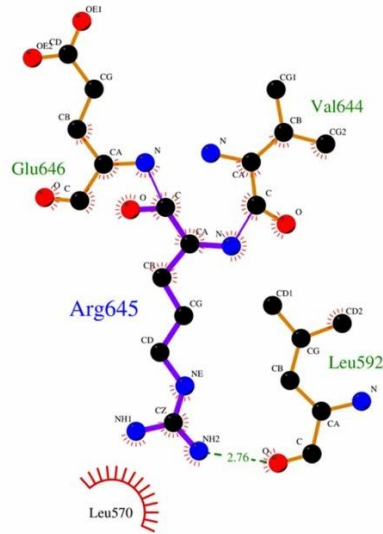

(C)

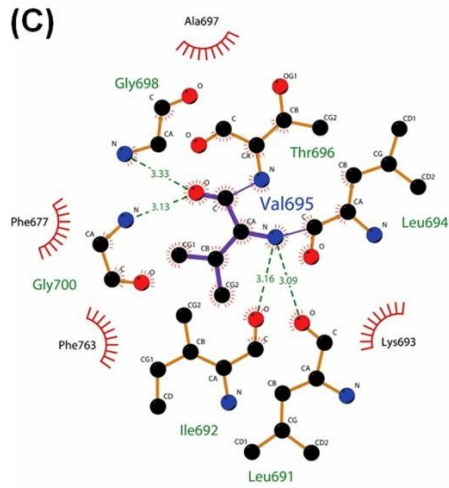

(D)

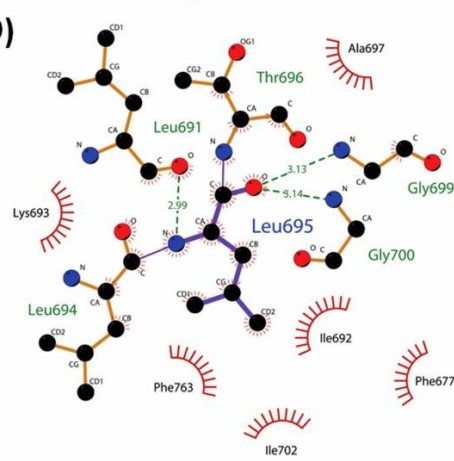

(E)

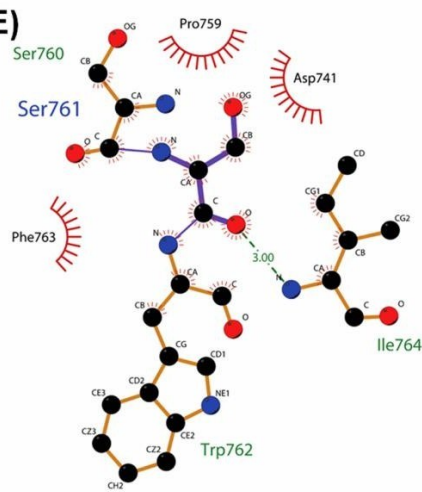

(F)

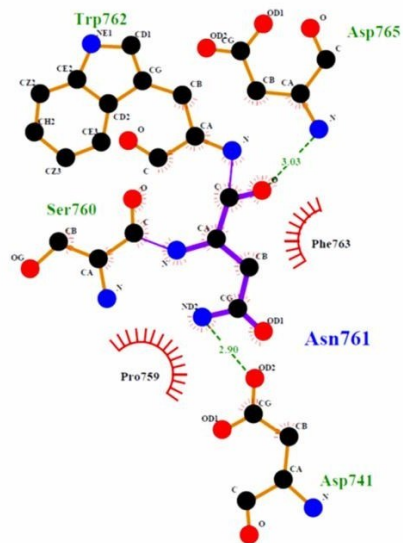

Supplement: c8ra06524a1.pdf [file c8ra06524a1.pdf]
